# Supplementary material for: Laser Ablation Electrospray Ionization Time-of-Flight Mass Spectrometry for Direct Analysis of Biological Tissue
Source: Hindawi journal article supplement (doi:10.1155/2019/1417035), 2019-10-29
Supplement: f1 [file 1417035.f1.pdf]

Table S1. Tentative assignment of 72 ions in porcine liver tissue and kidney tissue

| m/z      | Relative error /ppm | mSigma value | Formula                                                                         | Tentative assignment |
|----------|---------------------|--------------|---------------------------------------------------------------------------------|----------------------|
| 520.5093 | 1.0                 | 8.2          | $[\text{C}_{34}\text{H}_{67}\text{NO}_3+\text{H}-\text{H}_2\text{O}]^+$         | Cer(34:0)            |
| 548.5404 | 0.5                 | 19.3         | $[\text{C}_{36}\text{H}_{71}\text{NO}_3+\text{H}-\text{H}_2\text{O}]^+$         | Cer(36:1)            |
| 576.5704 | 1.7                 | 26.1         | $[\text{C}_{38}\text{H}_{75}\text{NO}_3+\text{H}-\text{H}_2\text{O}]^+$         | Cer(38:1)            |
| 604.6015 | 2.0                 | 23.7         | $[\text{C}_{40}\text{H}_{79}\text{NO}_3+\text{H}-\text{H}_2\text{O}]^+$         | Cer(40:1)            |
| 618.6165 | 3.1                 | 16.2         | $[\text{C}_{41}\text{H}_{81}\text{NO}_3+\text{H}-\text{H}_2\text{O}]^+$         | Cer(41:1)            |
| 630.6163 | 3.3                 | 9.8          | $[\text{C}_{42}\text{H}_{81}\text{NO}_3+\text{H}-\text{H}_2\text{O}]^+$         | Cer(42:2)            |
| 632.6314 | 4.1                 | 10.6         | $[\text{C}_{42}\text{H}_{83}\text{NO}_3+\text{H}-\text{H}_2\text{O}]^+$         | Cer(42:1)            |
| 704.6172 | 2.3                 | 20.1         | $[\text{C}_{44}\text{H}_{78}\text{O}_5+\text{NH}_4]^+$                          | DG(41:1)             |
| 744.5520 | 2.4                 | 15.9         | $[\text{C}_{41}\text{H}_{78}\text{NO}_8\text{P}+\text{H}]^+$                    | PE (36:2)            |
| 746.5701 | 0.9                 | 16.5         | $[\text{C}_{41}\text{H}_{80}\text{NO}_8\text{P}+\text{H}]^+$                    | PE (36:1)            |
| 758.5655 | 5.1                 | 14.2         | $[\text{C}_{42}\text{H}_{80}\text{NO}_8\text{P}+\text{H}]^+$                    | PC (34:2)            |
| 760.5832 | 2.5                 | 17.3         | $[\text{C}_{42}\text{H}_{82}\text{NO}_8\text{P}+\text{H}]^+$                    | PC (34:1)            |
| 768.5513 | 3.3                 | 26.0         | $[\text{C}_{43}\text{H}_{78}\text{NO}_8\text{P}+\text{H}]^+$                    | PC (35:4)            |
| 770.5704 | 1.3                 | 38.5         | $[\text{C}_{43}\text{H}_{80}\text{NO}_8\text{P}+\text{H}]^+$                    | PE (38:3)            |
| 772.5813 | 4.9                 | 41.6         | $[\text{C}_{43}\text{H}_{82}\text{NO}_8\text{P}+\text{H}]^+$                    | PE (38:2)            |
| 774.5988 | 2.5                 | 36.1         | $[\text{C}_{43}\text{H}_{84}\text{NO}_8\text{P}+\text{H}]^+$                    | PE (38:1)            |
| 782.5679 | 1.9                 | 37.6         | $[\text{C}_{44}\text{H}_{80}\text{NO}_8\text{P}+\text{H}]^+$                    | PC (36:4)            |
| 784.5827 | 3.1                 | 22.9         | $[\text{C}_{44}\text{H}_{82}\text{NO}_8\text{P}+\text{H}]^+$                    | PC (36:3)            |
| 786.5964 | 5.5                 | 19.6         | $[\text{C}_{44}\text{H}_{84}\text{NO}_8\text{P}+\text{H}]^+$                    | PC (36:2)            |
| 788.6115 | 6.2                 | 34.1         | $[\text{C}_{44}\text{H}_{86}\text{NO}_8\text{P}+\text{H}]^+$                    | PC (36:1)            |
| 790.6303 | 2.2                 | 45.8         | $[\text{C}_{44}\text{H}_{88}\text{NO}_8\text{P}+\text{H}]^+$                    | PC (36:0)            |
| 796.5824 | 3.4                 | 32.7         | $[\text{C}_{45}\text{H}_{82}\text{NO}_8\text{P}+\text{H}]^+$                    | PE (40:4)            |
| 798.5973 | 4.3                 | 27.4         | $[\text{C}_{45}\text{H}_{84}\text{NO}_8\text{P}+\text{H}]^+$                    | PE (40:3)            |
| 810.5965 | 5.2                 | 42.6         | $[\text{C}_{46}\text{H}_{84}\text{NO}_8\text{P}+\text{H}]^+$                    | PC (38:4)            |
| 812.6131 | 4.1                 | 39.3         | $[\text{C}_{46}\text{H}_{86}\text{NO}_8\text{P}+\text{H}]^+$                    | PC (38:3)            |
| 816.6444 | 4.0                 | 29.0         | $[\text{C}_{46}\text{H}_{90}\text{NO}_8\text{P}+\text{H}]^+$                    | PC (38:1)            |
| 818.6595 | 4.6                 | 33.7         | $[\text{C}_{46}\text{H}_{92}\text{NO}_8\text{P}+\text{H}]^+$                    | PC (38:0)            |
| 820.7378 | 1.3                 | 41.9         | $[\text{C}_{51}\text{H}_{94}\text{O}_6+\text{NH}_4]^+$                          | TAG (48:2)           |
| 822.7576 | 3.8                 | 35.2         | $[\text{C}_{51}\text{H}_{96}\text{O}_6+\text{NH}_4]^+$                          | TAG (48:1)           |
| 834.7522 | 2.8                 | 47.2         | $[\text{C}_{52}\text{H}_{96}\text{O}_6+\text{NH}_4]^+$                          | TAG (49:2)           |
| 836.7696 | 0.7                 | 40.6         | $[\text{C}_{52}\text{H}_{98}\text{O}_6+\text{NH}_4]^+$                          | TAG (49:1)           |
| 840.5956 | 6.4                 | 24.4         | $[\text{C}_{50}\text{H}_{84}\text{NO}_8\text{P}+\text{H}-\text{H}_2\text{O}]^+$ | PC (42:8)            |
| 844.7395 | 0.7                 | 19.8         | $[\text{C}_{53}\text{H}_{94}\text{O}_6+\text{NH}_4]^+$                          | TAG (50:4)           |
| 846.7561 | 0.7                 | 26.3         | $[\text{C}_{53}\text{H}_{96}\text{O}_6+\text{NH}_4]^+$                          | TAG (50:3)           |
| 848.7683 | 1.8                 | 21.9         | $[\text{C}_{53}\text{H}_{98}\text{O}_6+\text{NH}_4]^+$                          | TAG (50:2)           |
| 850.7865 | 0.8                 | 48.4         | $[\text{C}_{53}\text{H}_{100}\text{O}_6+\text{NH}_4]^+$                         | TAG (50:1)           |
| 852.8024 | 1.1                 | 39.0         | $[\text{C}_{53}\text{H}_{102}\text{O}_6+\text{NH}_4]^+$                         | TAG (50:0)           |
| 864.8023 | 0.9                 | 20.6         | $[\text{C}_{54}\text{H}_{102}\text{O}_6+\text{NH}_4]^+$                         | TAG (51:1)           |
| 874.7873 | 1.7                 | 13.1         | $[\text{C}_{55}\text{H}_{100}\text{O}_6+\text{NH}_4]^+$                         | TAG (52:3)           |
| 876.8001 | 1.6                 | 15.1         | $[\text{C}_{55}\text{H}_{102}\text{O}_6+\text{NH}_4]^+$                         | TAG (52:2)           |
| 878.8144 | 3.1                 | 25.4         | $[\text{C}_{55}\text{H}_{104}\text{O}_6+\text{NH}_4]^+$                         | TAG (52:1)           |
| 888.8024 | 1.0                 | 34.8         | $[\text{C}_{56}\text{H}_{102}\text{O}_6+\text{NH}_4]^+$                         | TAG (53:3)           |

|          |     |      |                                                         |            |
|----------|-----|------|---------------------------------------------------------|------------|
| 890.8150 | 2.4 | 28.4 | $[\text{C}_{56}\text{H}_{104}\text{O}_6+\text{NH}_4]^+$ | TAG (53:2) |
| 892.8301 | 3.0 | 37.3 | $[\text{C}_{56}\text{H}_{106}\text{O}_6+\text{NH}_4]^+$ | TAG (53:1) |
| 894.8453 | 3.5 | 24.9 | $[\text{C}_{56}\text{H}_{108}\text{O}_6+\text{NH}_4]^+$ | TAG (53:0) |
| 902.8152 | 2.1 | 27.8 | $[\text{C}_{57}\text{H}_{104}\text{O}_6+\text{NH}_4]^+$ | TAG (54:3) |
| 904.8294 | 3.8 | 23.1 | $[\text{C}_{57}\text{H}_{106}\text{O}_6+\text{NH}_4]^+$ | TAG (54:2) |
| 906.8463 | 2.3 | 28.3 | $[\text{C}_{57}\text{H}_{108}\text{O}_6+\text{NH}_4]^+$ | TAG (54:1) |
| 914.8142 | 3.2 | 18.6 | $[\text{C}_{58}\text{H}_{104}\text{O}_6+\text{NH}_4]^+$ | TAG (55:4) |
| 916.8310 | 2.0 | 11.5 | $[\text{C}_{58}\text{H}_{106}\text{O}_6+\text{NH}_4]^+$ | TAG (55:3) |
| 918.8468 | 1.7 | 9.9  | $[\text{C}_{58}\text{H}_{108}\text{O}_6+\text{NH}_4]^+$ | TAG (55:2) |
| 920.8638 | 0.3 | 5.8  | $[\text{C}_{58}\text{H}_{110}\text{O}_6+\text{NH}_4]^+$ | TAG (55:1) |
| 922.8755 | 4.6 | 13.9 | $[\text{C}_{58}\text{H}_{112}\text{O}_6+\text{NH}_4]^+$ | TAG (55:0) |
| 928.8344 | 1.7 | 18.7 | $[\text{C}_{59}\text{H}_{106}\text{O}_6+\text{NH}_4]^+$ | TAG (56:4) |
| 930.8475 | 1.0 | 22.8 | $[\text{C}_{59}\text{H}_{108}\text{O}_6+\text{NH}_4]^+$ | TAG (56:3) |
| 932.8653 | 1.3 | 14.7 | $[\text{C}_{59}\text{H}_{110}\text{O}_6+\text{NH}_4]^+$ | TAG (56:2) |
| 934.8831 | 3.6 | 22.2 | $[\text{C}_{59}\text{H}_{112}\text{O}_6+\text{NH}_4]^+$ | TAG (56:1) |
| 940.8352 | 2.4 | 20.5 | $[\text{C}_{60}\text{H}_{106}\text{O}_6+\text{NH}_4]^+$ | TAG (57:5) |
| 942.8459 | 2.7 | 26.4 | $[\text{C}_{60}\text{H}_{108}\text{O}_6+\text{NH}_4]^+$ | TAG (57:4) |
| 944.8658 | 1.8 | 12.9 | $[\text{C}_{60}\text{H}_{110}\text{O}_6+\text{NH}_4]^+$ | TAG (57:3) |
| 946.8827 | 3.2 | 25.0 | $[\text{C}_{60}\text{H}_{112}\text{O}_6+\text{NH}_4]^+$ | TAG (57:2) |
| 948.7983 | 3.4 | 17.3 | $[\text{C}_{61}\text{H}_{102}\text{O}_6+\text{NH}_4]^+$ | TAG (58:8) |
| 950.8194 | 2.4 | 29.6 | $[\text{C}_{61}\text{H}_{104}\text{O}_6+\text{NH}_4]^+$ | TAG (58:7) |
| 954.8443 | 4.3 | 21.8 | $[\text{C}_{61}\text{H}_{108}\text{O}_6+\text{NH}_4]^+$ | TAG (58:5) |
| 956.8666 | 2.6 | 24.4 | $[\text{C}_{61}\text{H}_{110}\text{O}_6+\text{NH}_4]^+$ | TAG (58:4) |
| 958.8812 | 1.6 | 33.2 | $[\text{C}_{61}\text{H}_{112}\text{O}_6+\text{NH}_4]^+$ | TAG (58:3) |
| 968.8671 | 3.1 | 29.2 | $[\text{C}_{62}\text{H}_{110}\text{O}_6+\text{NH}_4]^+$ | TAG (59:5) |
| 970.8826 | 3.0 | 40.8 | $[\text{C}_{62}\text{H}_{112}\text{O}_6+\text{NH}_4]^+$ | TAG (59:4) |
| 972.8980 | 2.7 | 38.9 | $[\text{C}_{62}\text{H}_{114}\text{O}_6+\text{NH}_4]^+$ | TAG (59:3) |
| 974.9152 | 4.3 | 37.2 | $[\text{C}_{62}\text{H}_{116}\text{O}_6+\text{NH}_4]^+$ | TAG (59:2) |
| 976.9301 | 3.5 | 32.1 | $[\text{C}_{62}\text{H}_{118}\text{O}_6+\text{NH}_4]^+$ | TAG (59:1) |
| 984.8987 | 3.4 | 42.3 | $[\text{C}_{63}\text{H}_{114}\text{O}_6+\text{NH}_4]^+$ | TAG (60:4) |
